# Supplementary material
Source: PubMed Central journal article supplement (PMC2965599)

**Caylobolide B, a Macrolactone from Symplostatin 1-Producing Marine Cyanobacteria**  
***Phormidium* spp. from Florida**

Lilibeth A. Salvador, Valerie J. Paul, and Hendrik Luesch

*Department of Medicinal Chemistry, University of Florida, 1600 SW Archer Road, Gainesville, Florida 32610, and Smithsonian Marine Station, 701 Seaway Drive, Fort Pierce, Florida 34949*

| <b>Contents</b>                                                                           | <b>Page Number</b> |
|-------------------------------------------------------------------------------------------|--------------------|
| <sup>1</sup> H NMR spectrum of caylobolide B ( <b>1</b> ) in DMSO- <i>d</i> <sub>6</sub>  | S2                 |
| <sup>13</sup> C NMR spectrum of caylobolide B ( <b>1</b> ) in DMSO- <i>d</i> <sub>6</sub> | S3                 |
| HSQC spectrum of caylobolide B ( <b>1</b> ) in DMSO- <i>d</i> <sub>6</sub>                | S4                 |
| HMBC spectrum of caylobolide B ( <b>1</b> ) in DMSO- <i>d</i> <sub>6</sub>                | S5                 |
| HSQC- TOCSY spectrum of caylobolide B ( <b>1</b> ) in DMSO- <i>d</i> <sub>6</sub>         | S6                 |
| COSY spectrum of caylobolide B ( <b>1</b> ) in DMSO- <i>d</i> <sub>6</sub>                | S7                 |
| TOCSY spectrum of caylobolide B ( <b>1</b> ) in DMSO- <i>d</i> <sub>6</sub>               | S8                 |
| <sup>1</sup> H NMR spectrum of symplostatin 1 in CD <sub>2</sub> Cl <sub>2</sub>          | S9                 |

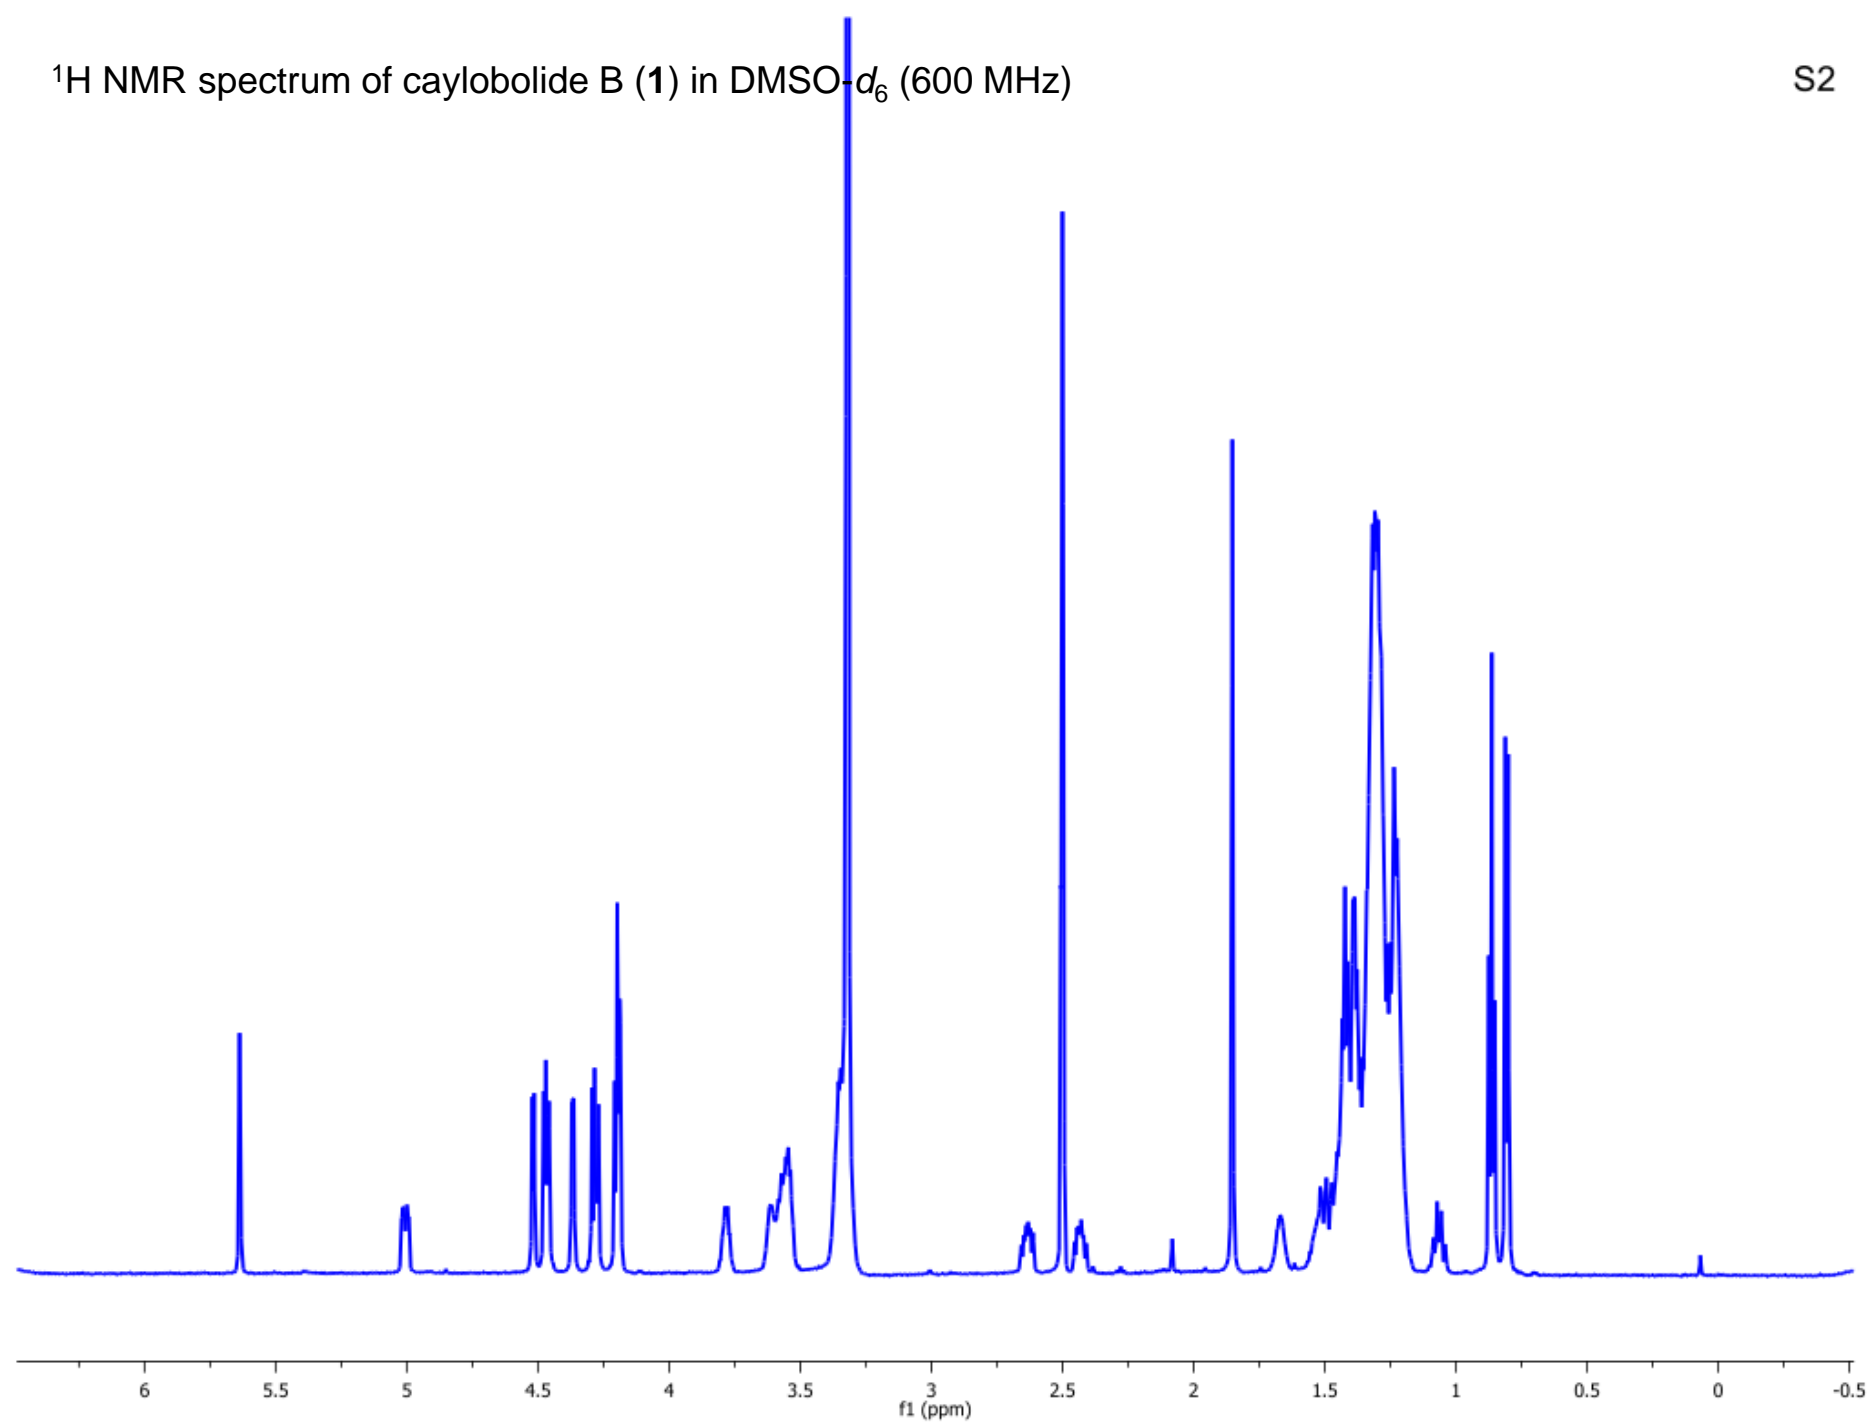

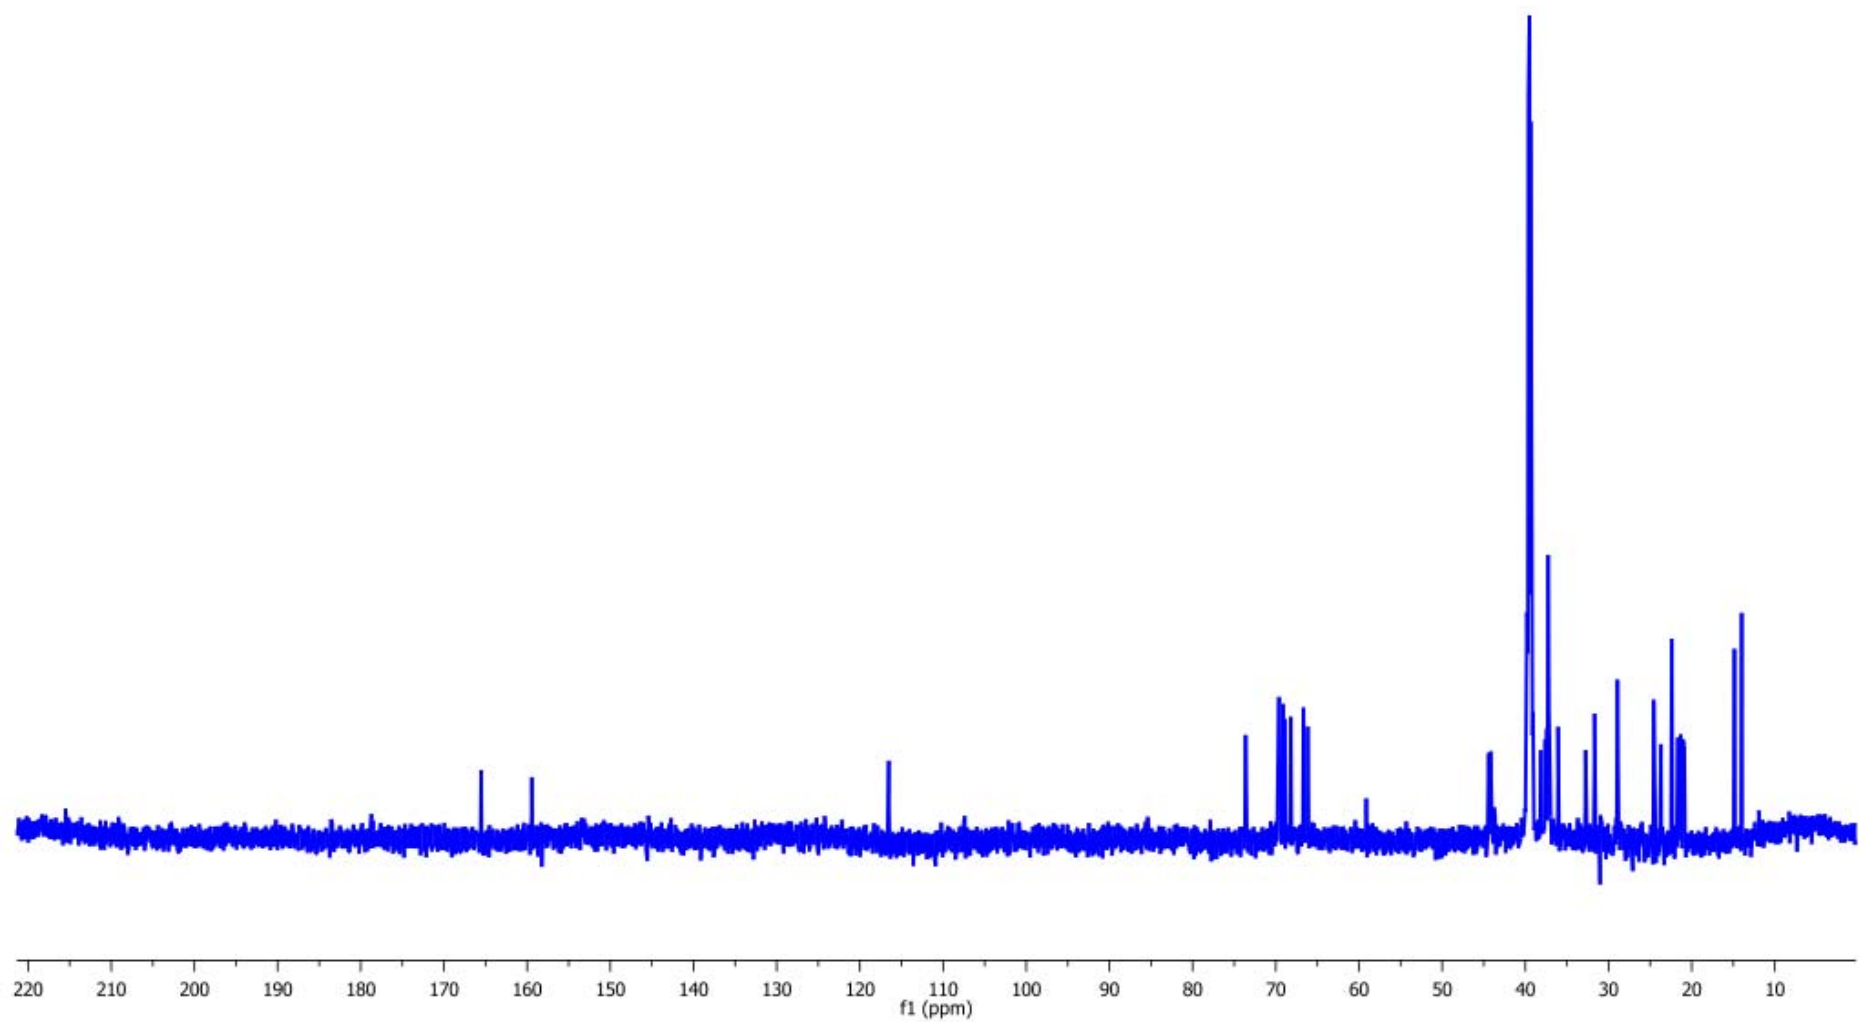

HSQC spectrum of caylobolide B (1) in DMSO- $d_6$  (600 MHz)

S4

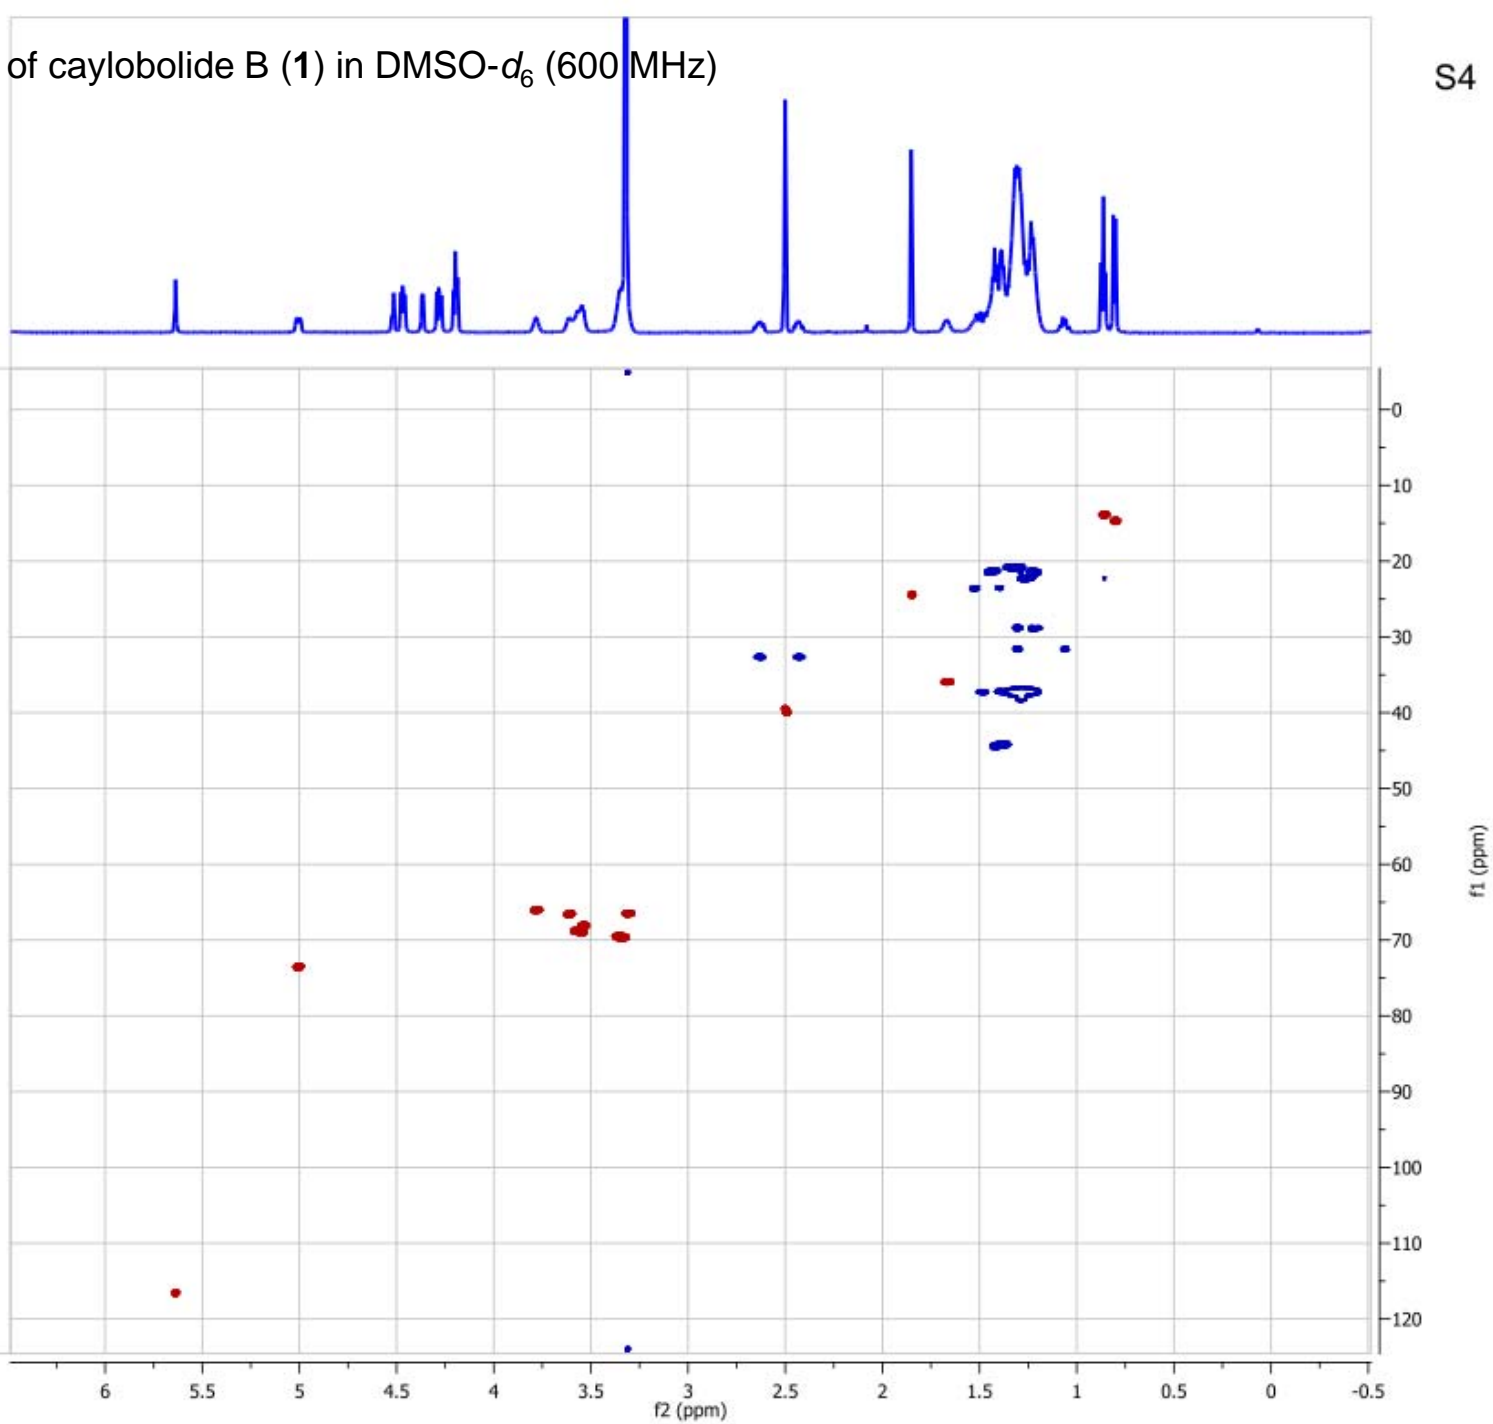

HMBC spectrum of caylobolide B (1) in DMSO- $d_6$  (600 MHz)

S5

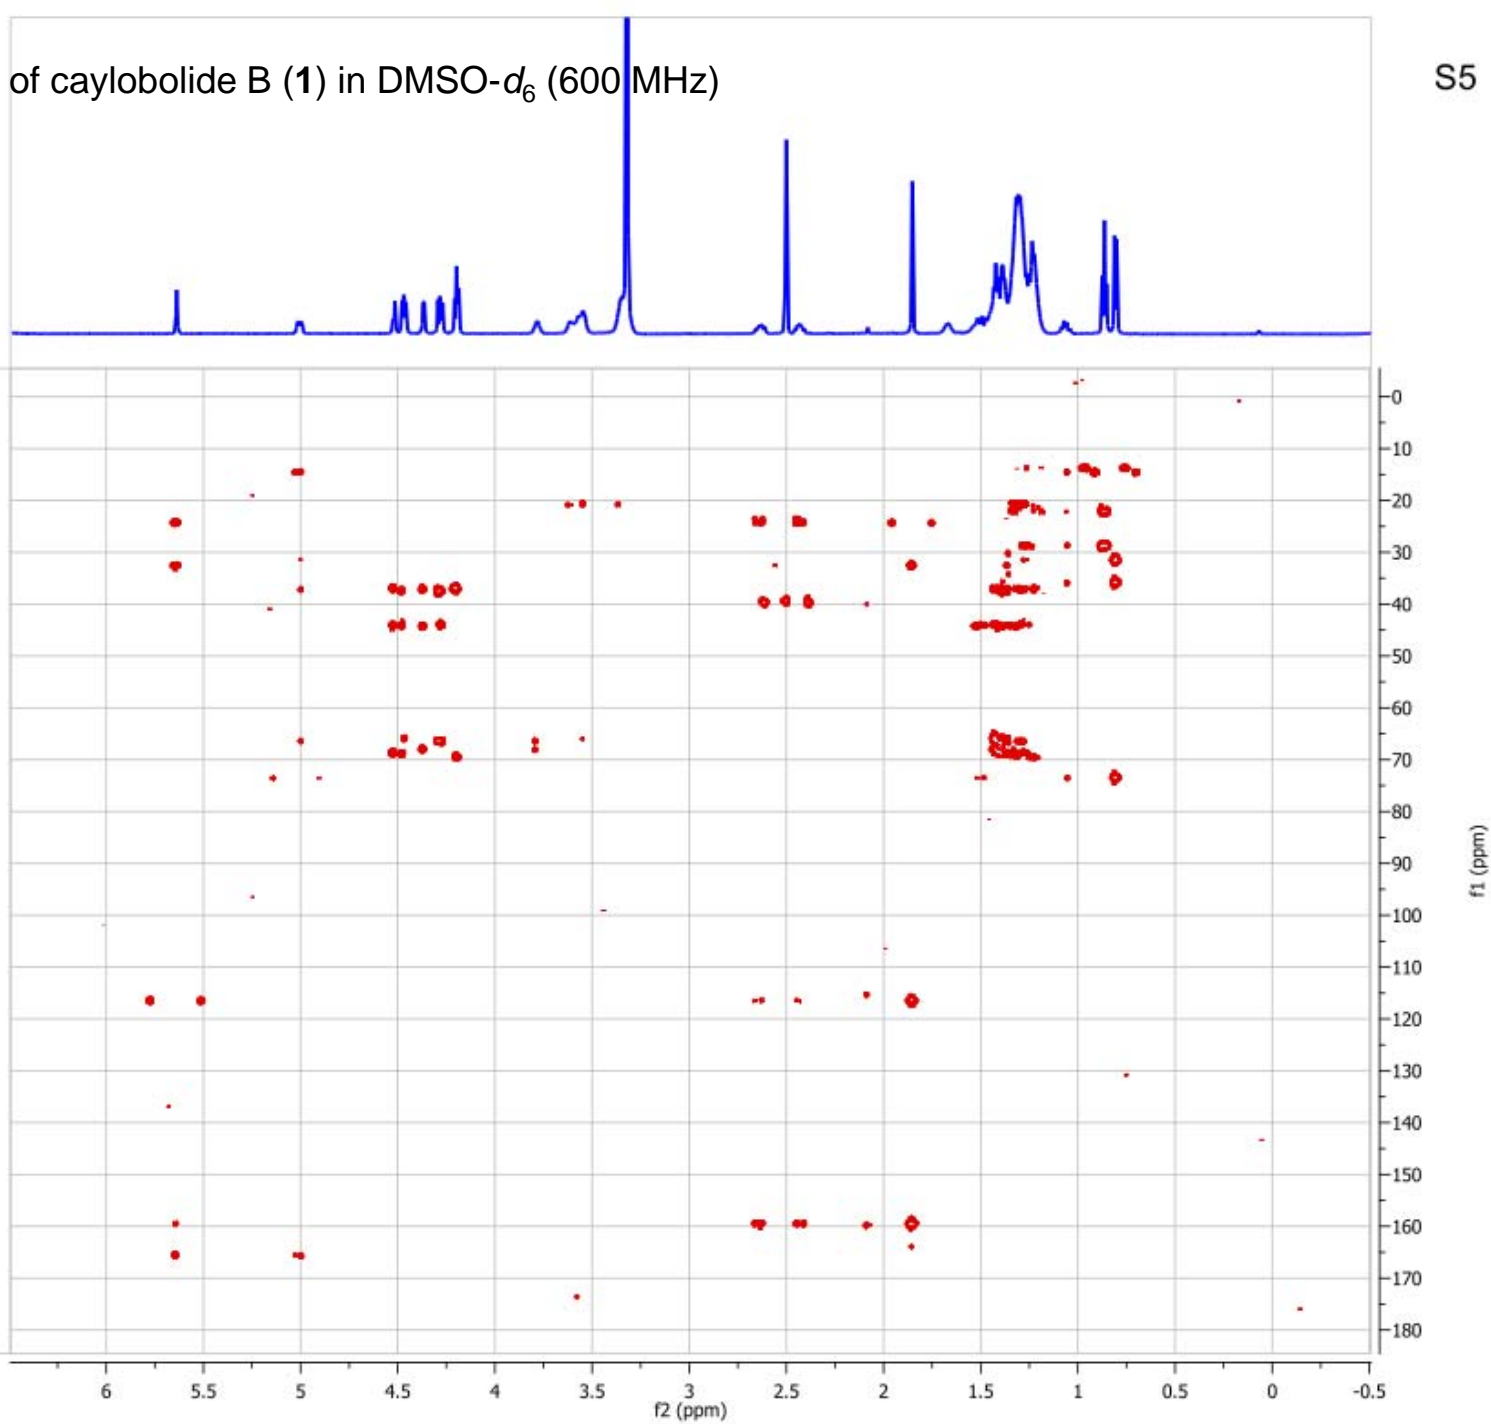

HSQC-TOCSY spectrum of caylobolide B (1) in DMSO- $d_6$  (600 MHz)

S6

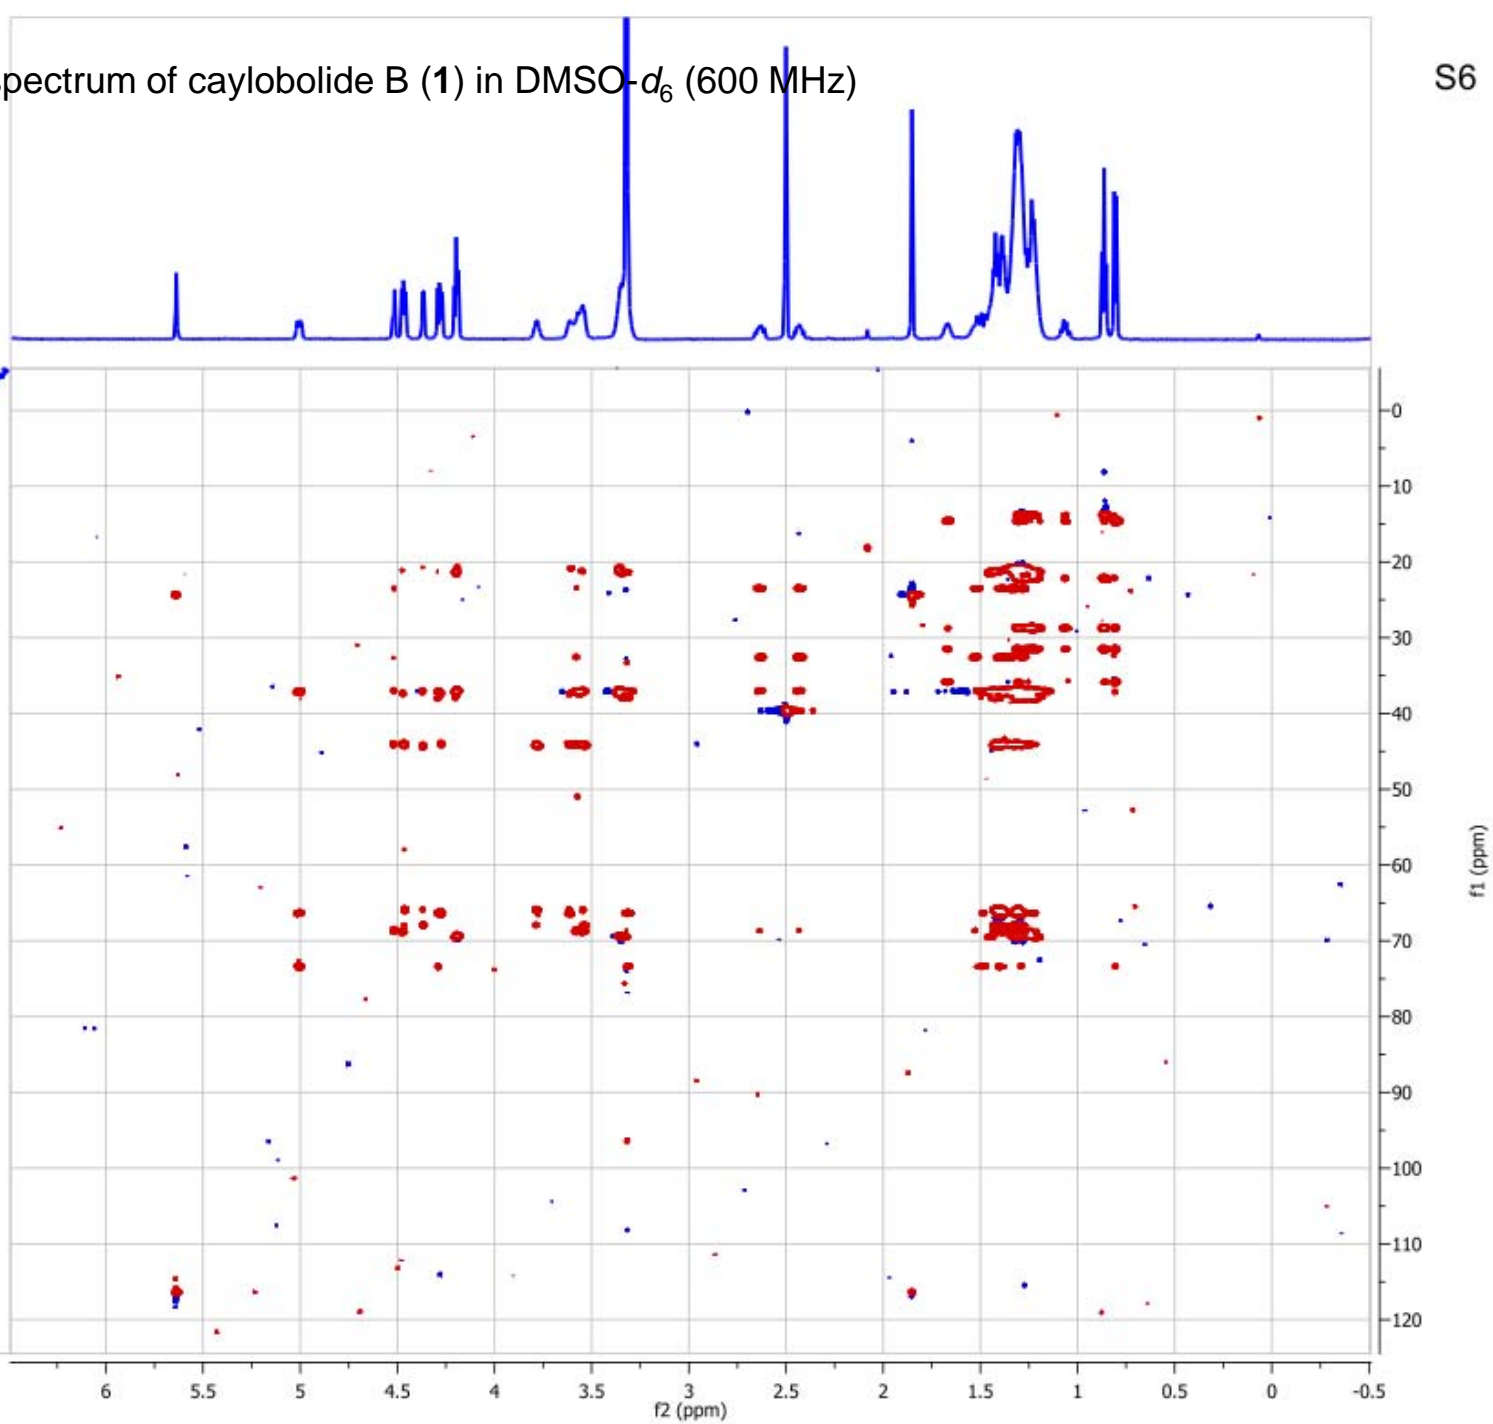

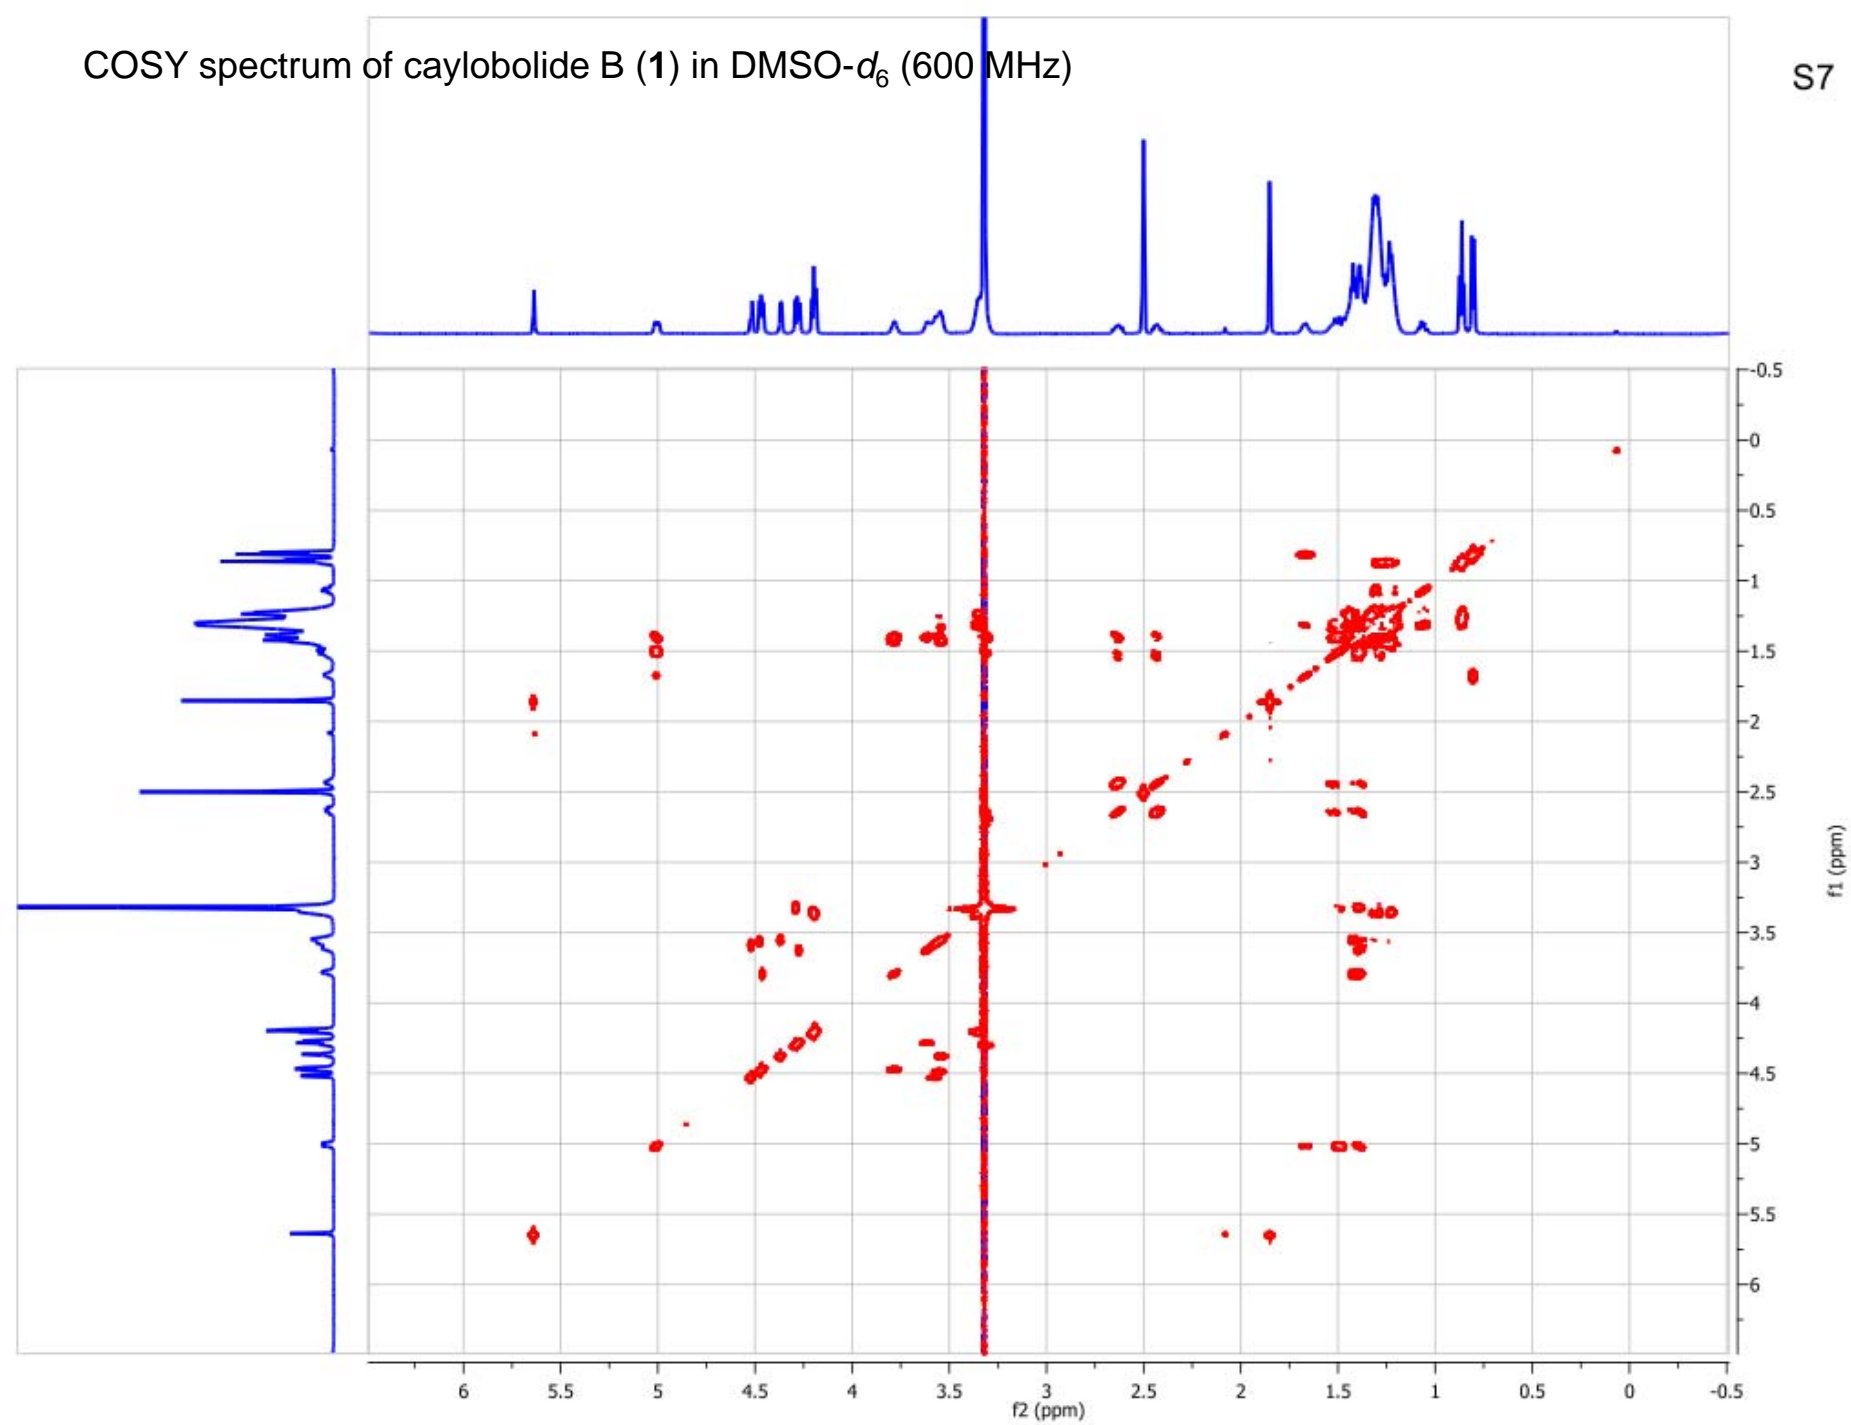

TOCSY spectrum of caylobolide B (1) in DMSO- $d_6$  (600 MHz)

S8

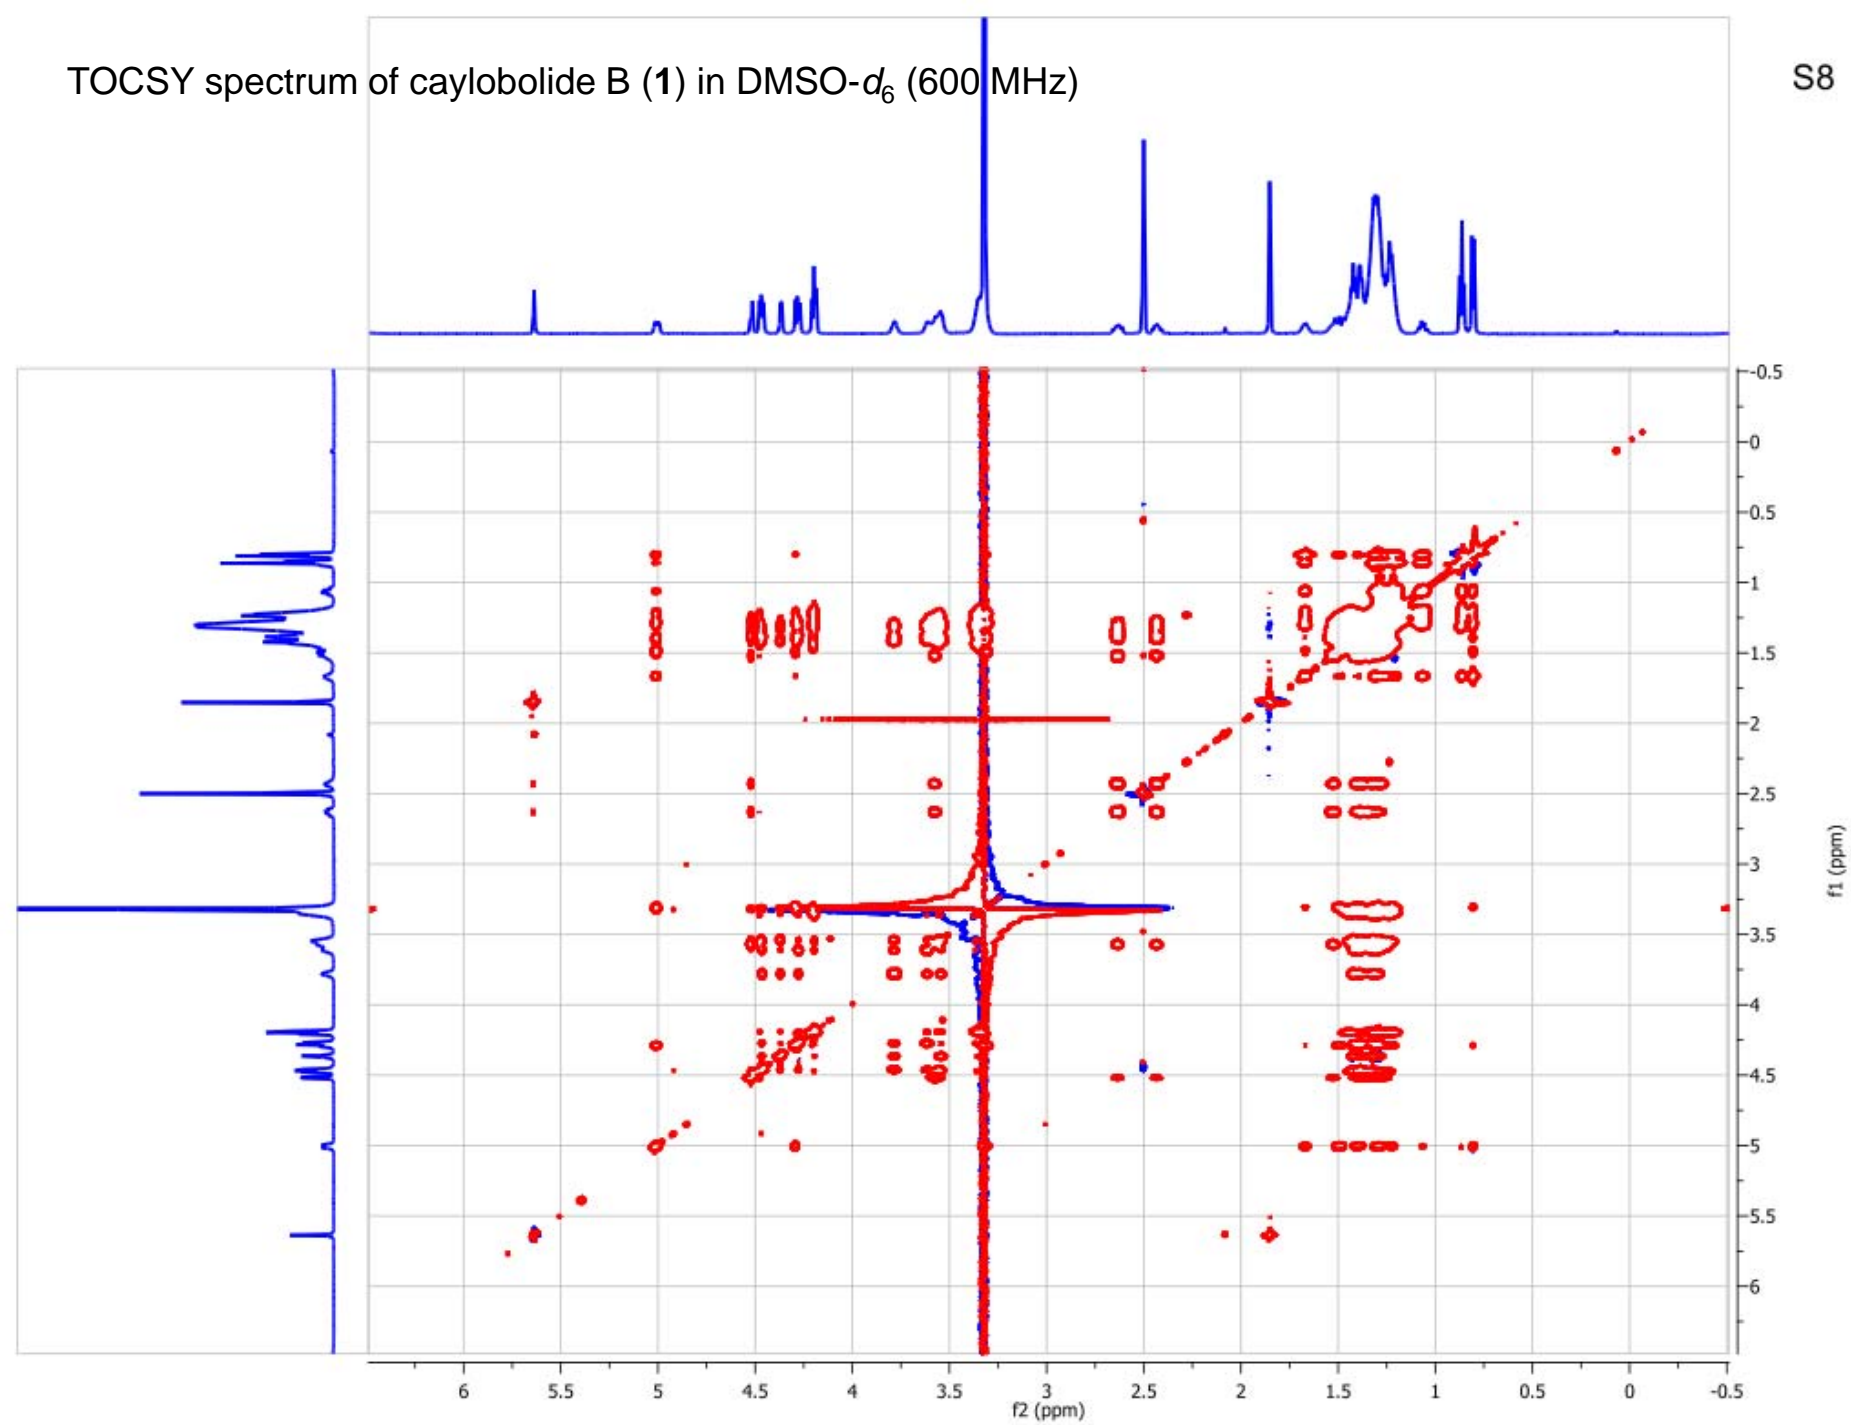



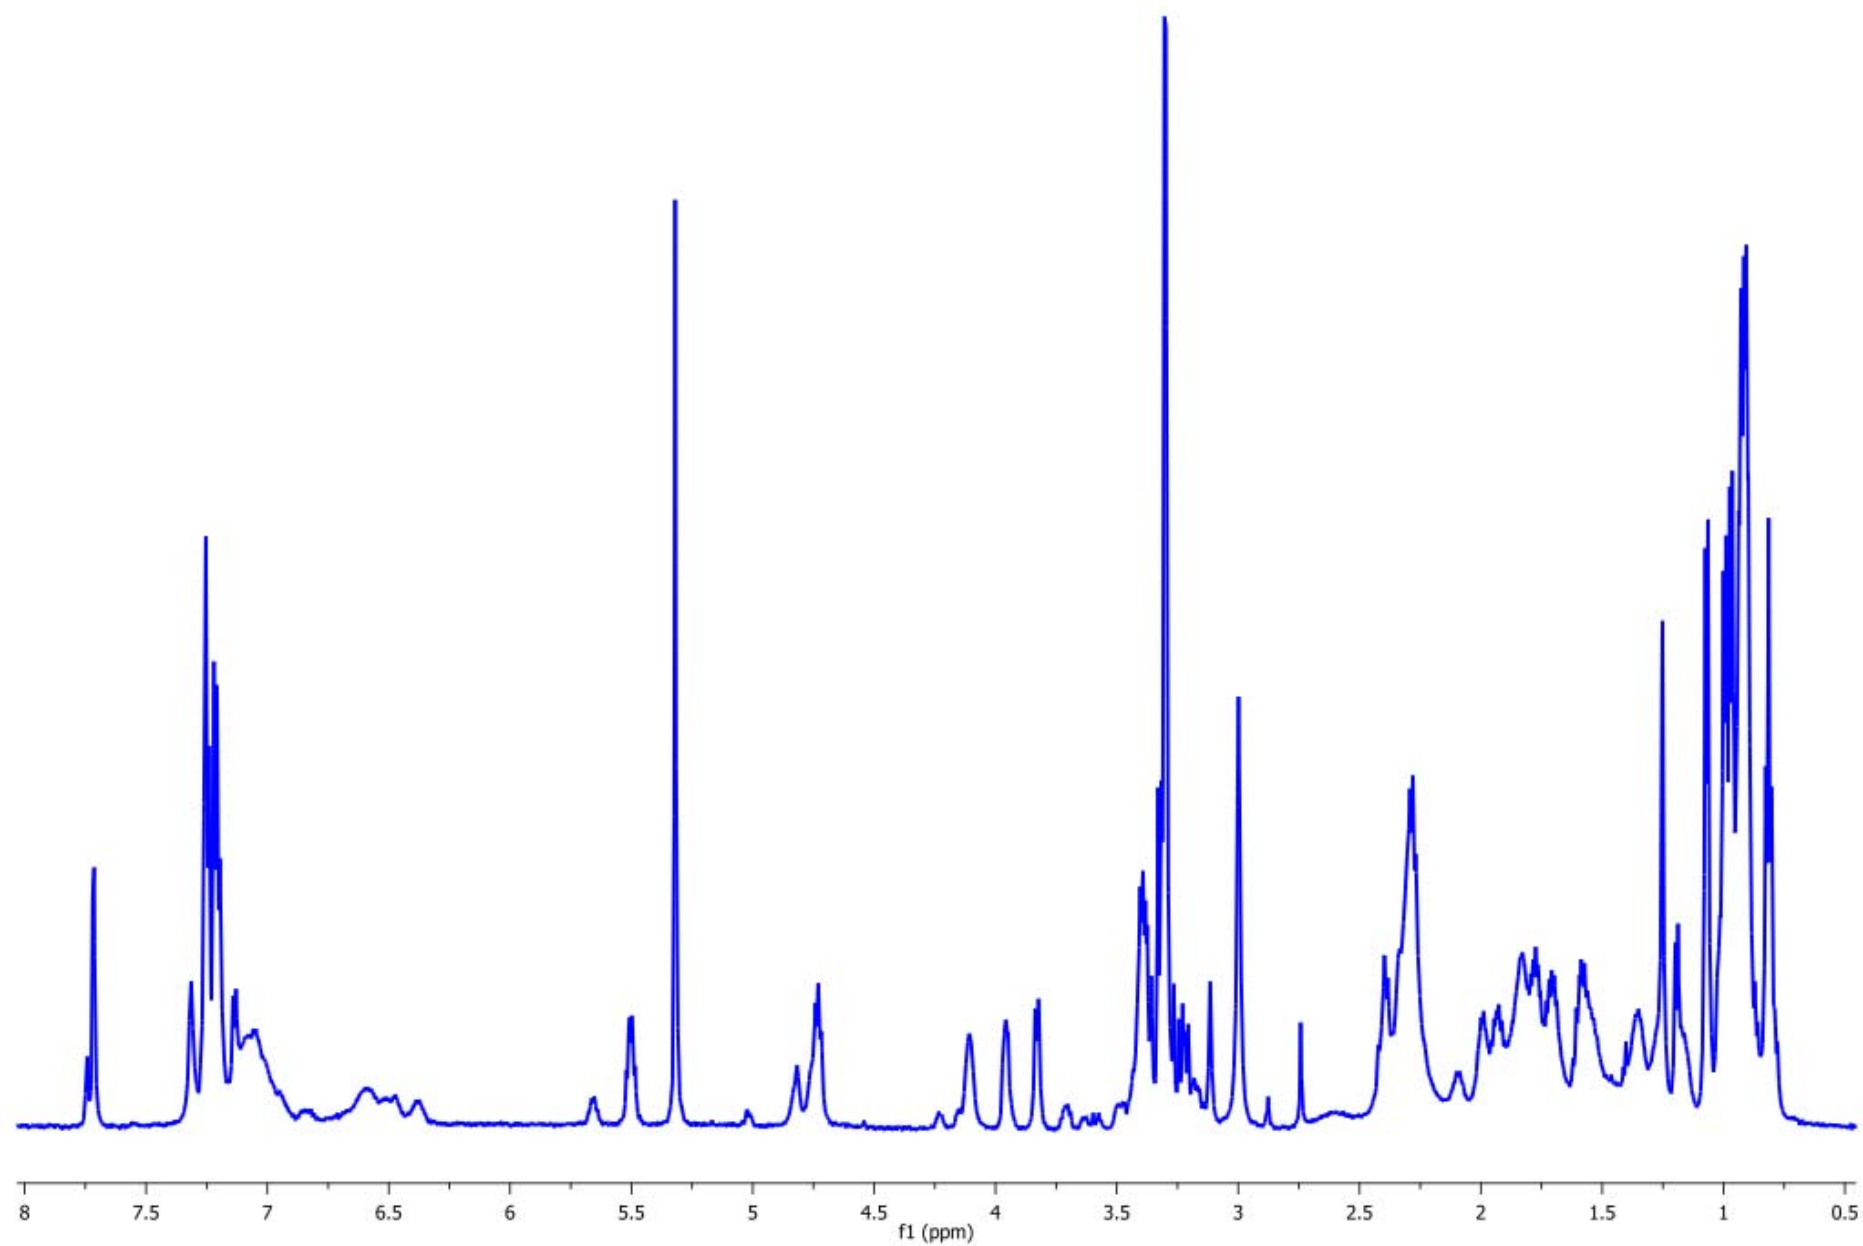

Supplement: NIHMS233607-supplement-1_si_001.pdf [file NIHMS233607-supplement-1_si_001.pdf]
